# Supplementary material for: Astragalus Shiitake—A Novel Functional Food with High Polysaccharide Content and Anti-Proliferative Activity in a Colorectal Carcinoma Cell Line
Source: MDPI journal article supplement (doi:10.3390/nu14112333), 2022-06-02
Supplement: s1 [file s1]

**Figure S1**

Comparing the effect of old reported UEA extraction technique [32] and new UEA extraction technique (developed in this study) on the total yield and antiproliferative activity of HAS-B polysaccharides.

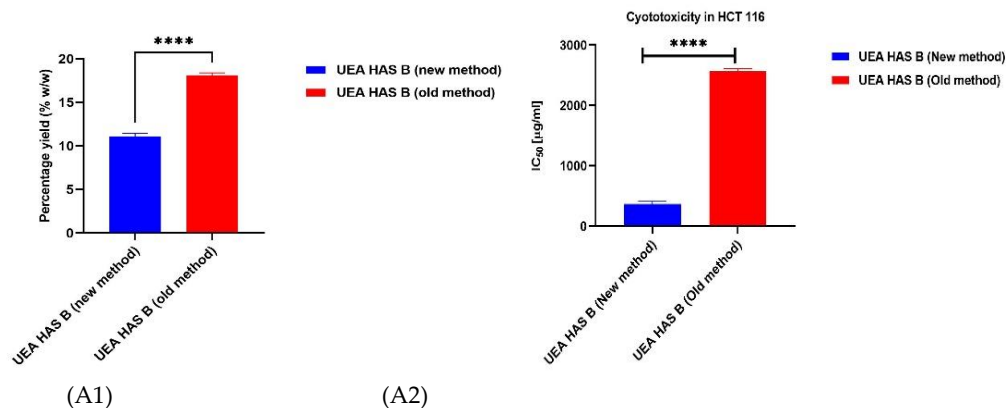

**Figure S1.** Effect of old and new UEA extraction techniques on total polysaccharide yield and cytotoxic activity against HCT 116. A1) Old extraction technique had significant increase in polysaccharide yield ( $P < 0.0001$ , indicated as \*\*\*\*) compared to new extraction technique applied in this study. A2) New extraction technique developed in this study showed significantly high cytotoxicity activity ( $P < 0.0001$ , indicated as \*\*\*\*) compared to the old reported technique.

**Figure S2:** Comparison of the yield and cytotoxicity of UEA HAS-B polysaccharides extracted from two different enzyme mixtures. ACPVP is the mixture of four different enzymes; Alcalase, Cellulase, Pectinase and Vinotaste-pro in a ratio 1:1:1:1 and ACP is the mixture of three different enzymes; Alcalase, Cellulase and Pectinase in a ratio 1:1:1.

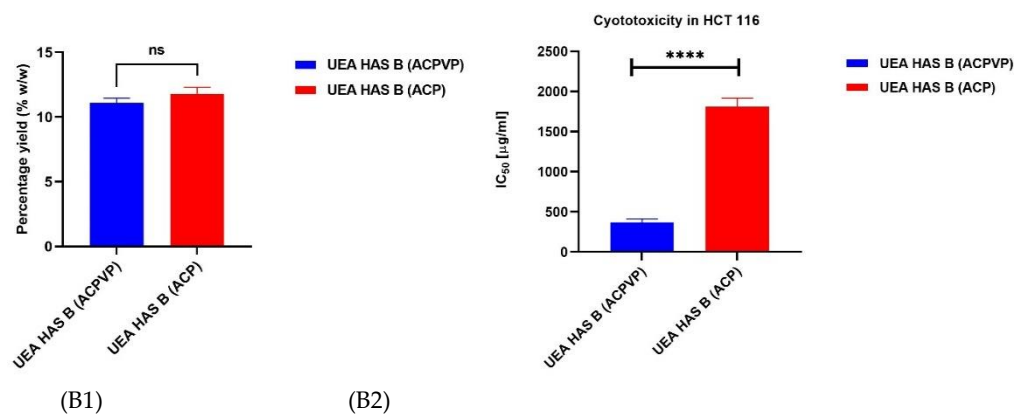

**Figure S2.** Effect of enzyme mixtures on yield and antiproliferative activity of HAS-B polysaccharides. B1) The percentage yield of UEA HAS-B polysaccharides, extracted from new enzyme mixture ACPVP (developed in this study) was not significantly different (indicated as “ns”) compared to previously reported enzyme mixture ACP. B2) UEA HAS-B polysaccharides from new enzyme mixture ACPVP showed significant increase in cytotoxic activity against HCT 116 ( $P < 0.0001$ , indicated as \*\*\*\*) compared to ACP.
